# Supplementary material
Source: Springer Nature journal article supplement (https://www.springermedizin.de/resource/supplementary/12875_2010_563_MOESM1_ESM.pdf/9434950)
Supplement: MOESM1 [file 9434950]

# Oakden Medical Centre

132-134 Fosters Road, Hillcrest 5086

Phone 8266 7788 Fax 8266 7755 ofrank@wvmc.com.au

Summary of preventive activities for Ms. Fictitious Patient

Dear Fictitious,

24/06/2009

The following preventive activities are important in helping you to stay well. The advice below is based on the information that we have in your record. If any of our information is incorrect, please tell me.

Dr. Oliver Frank

---

When we meet in a few minutes, please ask me about these activities that are **due to performed for you now:**

Influenza (the flu) causes serious illness. We have no record of an influenza immunisation for you. We recommend that you receive the influenza vaccine **today**.

Pneumonia is a serious illness. We have no record of a pneumococcal immunisation for you. We recommend that you receive the pneumococcal vaccine **today**.

Bowel cancer is a common cancer in people over the age of 50. Your last bowel cancer screening test was performed on 17/12/2006. We should arrange another bowel cancer test for you **today**.

---

The following activities will be due for you on the dates shown:

Your last blood pressure reading was 136/70mmHg on 02/01/2008. We should measure your blood pressure again on 02/01/2010.

Your last cholesterol reading was 4.9mmol/L on 08/07/2008. We should measure your cholesterol again on 08/07/2013.

Your last blood sugar level was 4.6mmol on 08/07/2008. We should measure your blood sugar again on 08/07/2011

Your last cervical (Pap) smear test was on 14/04/2008. We should perform your next smear test on 14/04/2010.

Our records show that you are a former smoker. By stopping smoking, you have greatly increased your chances of staying well. If you have started smoking again, please ask me about new methods that can help you to **become a non smoker** once more.
